# Supplementary material for: Impact of Pre-Liver Transplant Treatments on the Imaging Accuracy of HCC Staging and Their Influence on Outcomes
Source: MDPI journal article supplement (doi:10.3390/cancers16051043), 2024-03-04
Supplement: s1 [file s1]

**Table S1.** Classification according to the Milan Criteria

|              | DIAGNOSIS   | LISTING    | TRANSPLANT |            |
|--------------|-------------|------------|------------|------------|
|              |             |            | Radiology  | Pathology  |
| MILAN-IN     | 110 (83%)   | 120 (91%)  | 88         | 79         |
| UP TO 7 IN   | 16 (12%)    | 9 (7%)     | 7          | 16         |
| UP TO 7 OUT  | 6 (5%)      | 3 (2%)     | 6          | 16         |
| <b>TOTAL</b> | <b>132*</b> | <b>132</b> | <b>101</b> | <b>111</b> |

\* 2 patients with HCC diagnosis at transplant

**Table S2.** HCC status at transplant

|                     | RADIOLOGY  | PATHOLOGY  |
|---------------------|------------|------------|
| COMPLETE RESPONSE   | 18         | 33         |
| PARTIAL RESPONSE    | 68         | 48         |
| STABLE DISEASE      | 23         | 21         |
| PROGRESSION DISEASE | 23         | 32         |
| <b>TOTAL</b>        | <b>132</b> | <b>134</b> |
|                     |            |            |
|                     | RADIOLOGY  | PATHOLOGY  |
| T1                  | 41         | 30         |
| T2                  | 59         | 76         |
| T3                  | 0          | 3          |
| T4                  | 1          | 2          |
| <b>TOTAL</b>        | <b>101</b> | <b>111</b> |

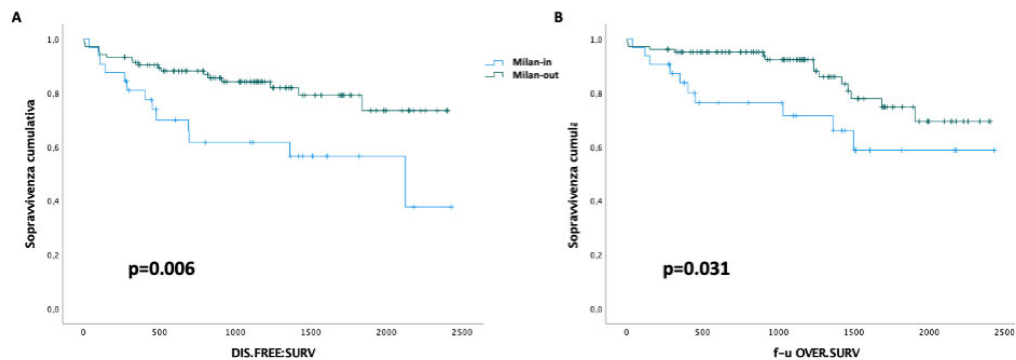

**Figure S1.** Overall (A) and disease free (B) survival of patients with Milan-in and Milan-out hepatocellular carcinoma staging at pathological analyses.

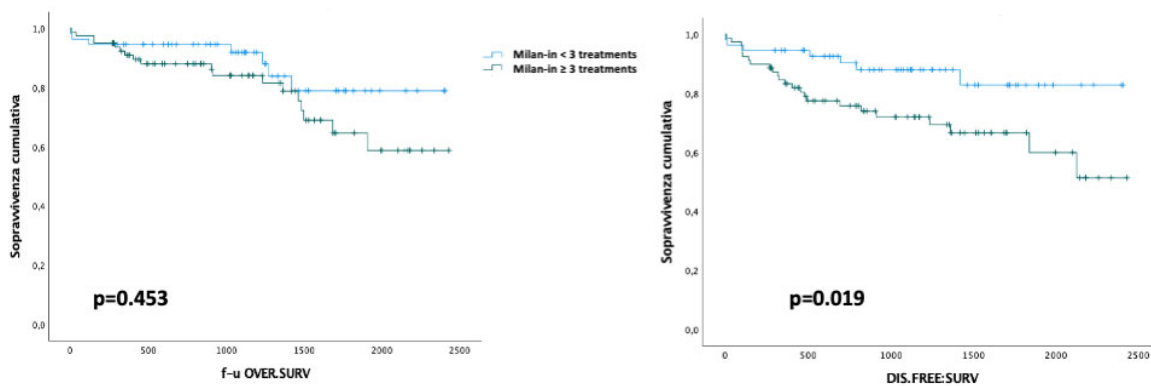

**Figure S2.** Overall (A) and disease free (B) survival of patients with Milan-in hepatocellular carcinoma staging at pathological analyses achieved with a number of pre-liver transplantation treatments inferior or equal/superior to 3.

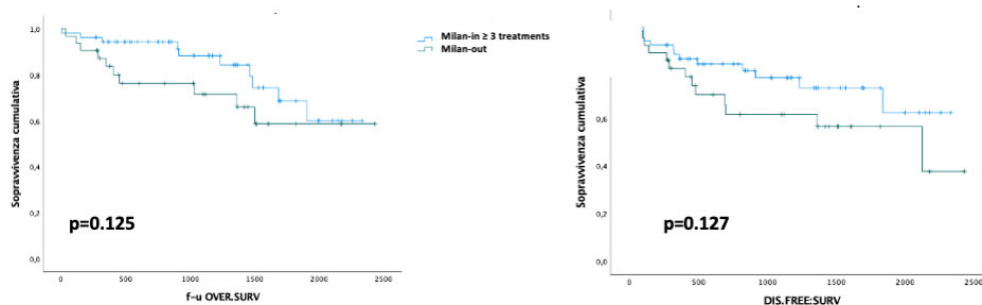

**Figure S3.** Overall (A) and disease free (B) survival of patients with Milan-in hepatocellular carcinoma staging at pathological analyses achieved with a number of pre-liver transplantation or equal/superior to 3 and Milan-out patients.
